# Supplementary material for: Exploring the potential of ZnO–Ag@AgBr/SBA-15 Z-scheme heterostructure for efficient wastewater treatment: synthesis, characterization, and real-world applications
Source: Royal Society of Chemistry journal article supplement (doi:10.1039/d3ra01856c), 2023-01-01
Supplement: d3ra01856c1.pdf [file d3ra01856c1.pdf]

## Exploring the Potential of ZnO-Ag@AgBr/SBA-15 Z-Scheme Heterostructure for Efficient Wastewater Treatment: Synthesis, Characterization, and Real-World Applications

Giang T.T Pham,<sup>a</sup> Hoa T. Vu,<sup>a</sup> Tham Thi Pham,<sup>a</sup> Nguyen Ngoc Thanh,<sup>a</sup> Van Ngo Thuy,<sup>a</sup> Tran Quang Hung,<sup>b</sup> Huan V. Doan<sup>\*c</sup> and Manh B. Nguyen<sup>\*b,d</sup>

<sup>a</sup>Faculty of Chemical Technology, Hanoi University of Industry, 298 Minh Khai, Bac Tu Liem, Ha Noi 10000, Vietnam

<sup>b</sup>Institute of Chemistry, Vietnam Academy of Science and Technology, 18 Hoang Quoc Viet street, Cau Giay, Ha Noi, Vietnam.

<sup>c</sup>Department of Mechanical Engineering, University of Bristol, Bristol BS8 1TH, UK

<sup>d</sup>Graduate University of Science and Technology, Vietnam Academy of Science and Technology, 18 Hoang Quoc Viet Street, Cau Giay, Ha Noi, Vietnam

\*Corresponding authors: [nguyenbamanh@ich.vast.vn](mailto:nguyenbamanh@ich.vast.vn) (Manh B. Nguyen), and [huan.doan@bristol.ac.uk](mailto:huan.doan@bristol.ac.uk) (Huan.V. Doan).

Table S1. Element composition of Ag@AgBr/SBA-15 and ZnO-Ag@AgBr/SBA-15 samples.

| Samples               | Si    | O     | Al   | Br   | Ag   | Zn    | Total |
|-----------------------|-------|-------|------|------|------|-------|-------|
| Ag@AgBr/SBA-15        | 32.05 | 59.19 | 0.35 | 1.53 | 6.88 | -     | 100   |
| 10%ZnO-Ag@AgBr/SBA-15 | 28.62 | 56.31 | 0.28 | 1.32 | 6.17 | 7.3   | 100   |
| 20%ZnO-Ag@AgBr/SBA-15 | 25.48 | 53.54 | 0.98 | 0.19 | 5.78 | 14.03 | 100   |
| 30%ZnO-Ag@AgBr/SBA-15 | 23.53 | 47.58 | 0.89 | 0.14 | 5.03 | 22.83 | 100   |

Table S2. Effect of reaction conditions on removal efficiency of phenol red

| <b>Influence factors</b>                             | <b>Reaction conditions</b>                                                                                                                      | <b>Factors of changes</b>                          | <b>Removal (%)</b> |
|------------------------------------------------------|-------------------------------------------------------------------------------------------------------------------------------------------------|----------------------------------------------------|--------------------|
| Effect of initial phenol red concentration           | $V_{\text{phenol red}} = 100 \text{ mL}$ , $m_{\text{catalyst}} = 400 \text{ mg/L}$ , $\text{pH} = 5$                                           | $[\text{Phenol red}] = 10 \text{ mg/L}$            | 99.4               |
|                                                      |                                                                                                                                                 | $[\text{Phenol red}] = 15 \text{ mg/L}$            | 98.9               |
|                                                      |                                                                                                                                                 | $[\text{Phenol red}] = 20 \text{ mg/L}$            | 98.8               |
|                                                      |                                                                                                                                                 | $[\text{Phenol red}] = 25 \text{ mg/L}$            | 91.5               |
| Effect of initial pH                                 | $V_{\text{phenol red}} = 100 \text{ mL}$ , $m_{\text{catalyst}} = 400 \text{ mg/L}$ , $[\text{Phenol red}] = 20 \text{ mg/L}$                   | $\text{pH} = 3$                                    | 99.2               |
|                                                      |                                                                                                                                                 | $\text{pH} = 5$                                    | 98.8               |
|                                                      |                                                                                                                                                 | $\text{pH} = 7$                                    | 92.5               |
|                                                      |                                                                                                                                                 | $\text{pH} = 9$                                    | 72.4               |
| Effect of amount of photocatalysts                   | $V_{\text{phenol red}} = 100 \text{ mL}$ , $[\text{Phenol red}] = 20 \text{ mg/L}$ , $\text{pH} = 5$                                            | $m_{\text{catalyst}} = 200 \text{ mg/L}$           | 87.6               |
|                                                      |                                                                                                                                                 | $m_{\text{catalyst}} = 300 \text{ mg/L}$           | 92.8               |
|                                                      |                                                                                                                                                 | $m_{\text{catalyst}} = 400 \text{ mg/L}$           | 98.8               |
|                                                      |                                                                                                                                                 | $m_{\text{catalyst}} = 500 \text{ mg/L}$           | 99.4               |
| Effects of different types of natural surface waters | $V_{\text{phenol red}} = 100 \text{ mL}$ , $[\text{Phenol red}] = 20 \text{ mg/L}$ , $\text{pH} = 5$ , $m_{\text{catalyst}} = 400 \text{ mg/L}$ | Hong river                                         | 94.7               |
|                                                      |                                                                                                                                                 | To Lich river                                      | 31.1               |
|                                                      |                                                                                                                                                 | Hoan Kiem lake                                     | 69.6               |
|                                                      |                                                                                                                                                 | West lake                                          | 89.8               |
| Reaction radical trap experiments                    | $V_{\text{phenol red}} = 100 \text{ mL}$ , $[\text{Phenol red}] = 20 \text{ mg/L}$ , $\text{pH} = 5$ , $m_{\text{catalyst}} = 400 \text{ mg/L}$ | No Scavenger                                       | 98.8               |
|                                                      |                                                                                                                                                 | TBA ( $\cdot\text{OH}$ )                           | 65.2               |
|                                                      |                                                                                                                                                 | AO ( $\text{h}^+$ )                                | 51.1               |
|                                                      |                                                                                                                                                 | BQ ( $\cdot\text{O}_2^-$ )                         | 24.4               |
|                                                      |                                                                                                                                                 | $\text{K}_2\text{Cr}_2\text{O}_7$ ( $\text{e}^-$ ) | 98.2               |

Table S3. Comparative results of Phenol red pollutants removal by various heterogeneous materials

| Samples                     | Reaction conditions                                                                                                             | Removal efficiency (%) | Reaction time (min ) | Ref.         |
|-----------------------------|---------------------------------------------------------------------------------------------------------------------------------|------------------------|----------------------|--------------|
| 20%ZnO-Ag@AgBr/SBA-15       | Lamp: Solar light irradiation.<br>[Catalyst] = 400 mg/L<br>[Phenol red] = 20 mg/L<br>T = 25 °C<br>pH = 5                        | 98,6                   | 120                  | This word    |
| TiO <sub>2</sub>            | Lamp: Solar light irradiation.<br>[Catalyst] = 600 mg/L<br>[Phenol red] = 13.3 mg/L<br>T = 25 °C<br>pH = 4.4                    | 87.3                   | 100                  | <sup>1</sup> |
| Nb(2.0)/TiO <sub>2</sub>    | Lamp: UV, 400 W<br>[Catalyst] = 100 mg/L<br>[Phenol red] = 20 mg/L                                                              | 94                     | 160                  | <sup>2</sup> |
| CuO/ZnO/TiO <sub>2</sub>    | Lamp: UV light, 6 W<br>[Catalyst] = 100 mg/L<br>[Phenol red] = 10 mg/L<br>T = 30 °C<br>pH = 6                                   | 100                    | 180                  | <sup>3</sup> |
| TiO <sub>2</sub>            | Lamp: 15 W<br>[Catalyst] = 500 mg/L<br>[Phenol red] = 10.3 mg/L<br>pH = 4.5                                                     | 92                     | 240                  | <sup>4</sup> |
| ZnO                         | Lamp: UV light irradiation<br>[Catalyst] = 500 mg/L<br>[Phenol red]= 0.38 mg/L<br>pH = 6.5<br>T = 25 °C                         | 97                     | 60                   | <sup>5</sup> |
| Goethite ( $\alpha$ -FeOOH) | Lamp: UV (Philips HPW 125)<br>[Catalyst] = 1000 mg/L<br>[Phenol red]= 10 <sup>-5</sup> mol/L = 3.54 mg/L<br>pH = 3<br>T = 25 °C | 41.25                  | 240                  | <sup>6</sup> |

Table S4. Results of LC-MS analysis decomposition of Phenol red on photocatalyst  
20%ZnO-Ag@AgBr/SBA-15

| m/z    | Probable structure                                                                  |        | Probable structure                                                                    |
|--------|-------------------------------------------------------------------------------------|--------|---------------------------------------------------------------------------------------|
| 355.28 | 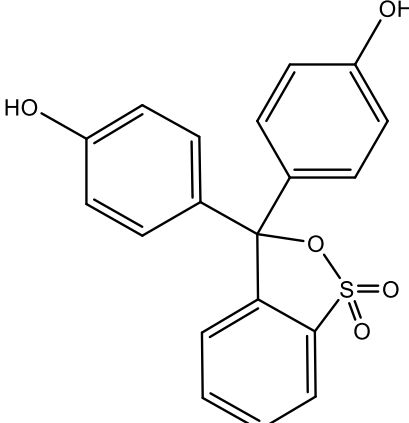   | 116.16 |    |
| 290.24 |   | 118.06 |   |
| 279.03 |  | 104.05 |  |
| 216.35 |  | 74.04  |  |
| 126.81 |  | 60.04  |  |

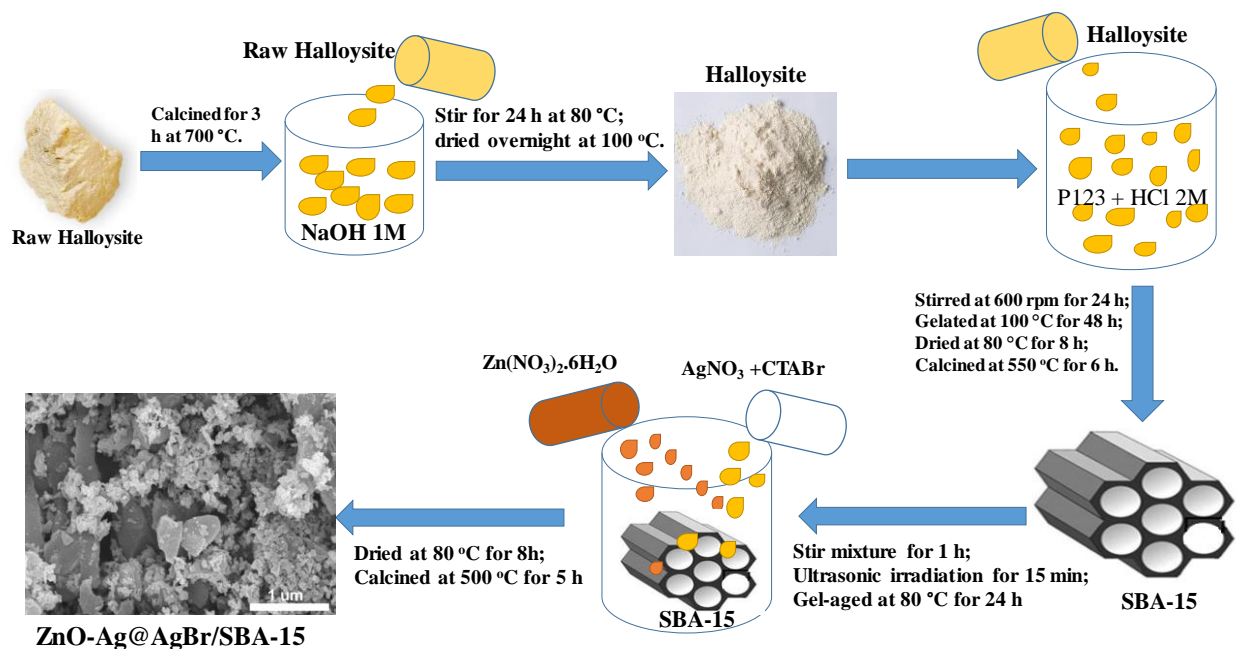

Figure 1S. Schematic synthesis of ZnO-Ag@AgBr/SBA-15 materials from natural halloysite

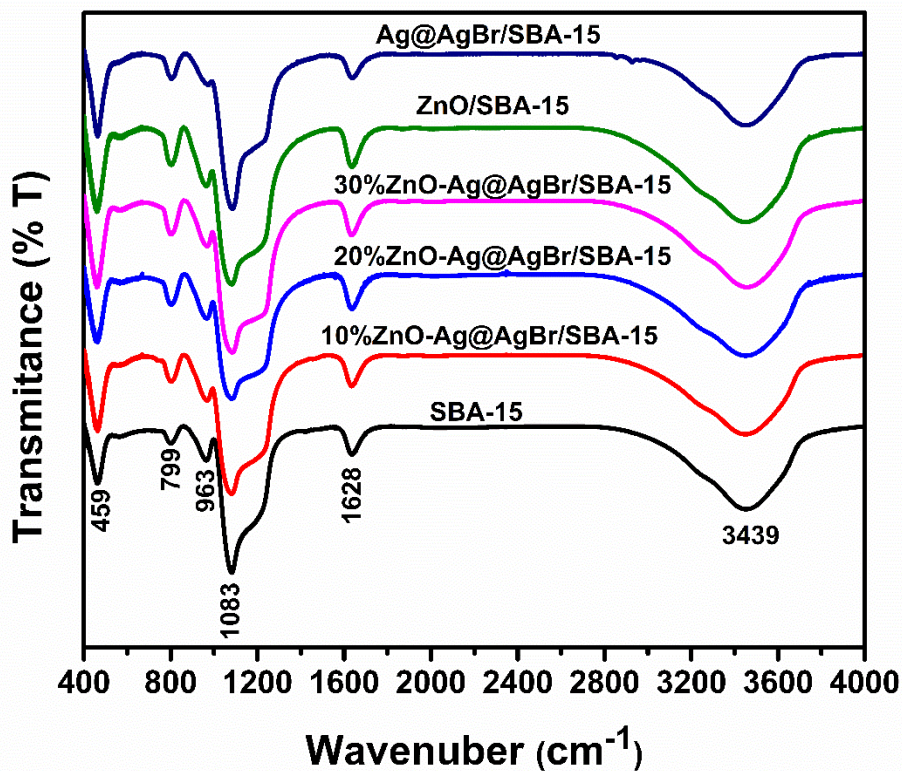

Figure S2. FT-IR spectra of Ag@AgBr/SBA-15, ZnO/SBA-15 and ZnO-Ag@AgBr/SBA-15 samples

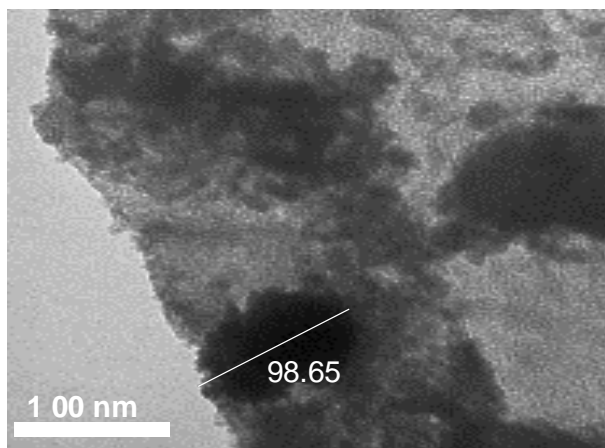

Figure S3. TEM image of 30% ZnO-Ag@AgBr/SBA-15 sample

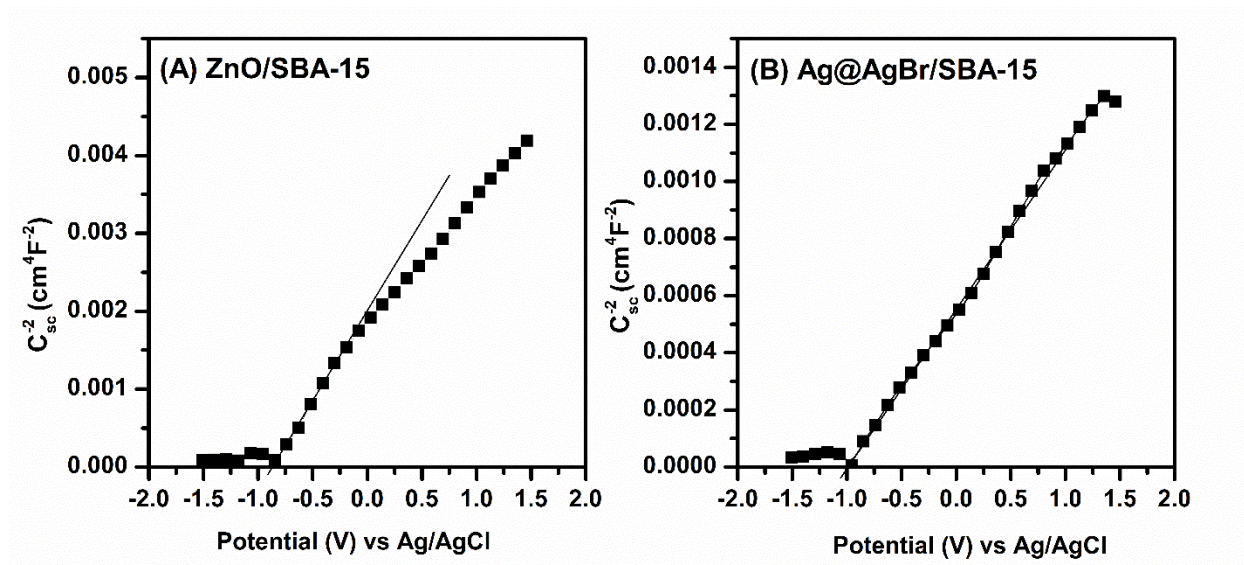

Figure S4. Mott Schotky plot of ZnO/SBA-15 (A) and Ag@AgBr/SBA-15 (B) samples

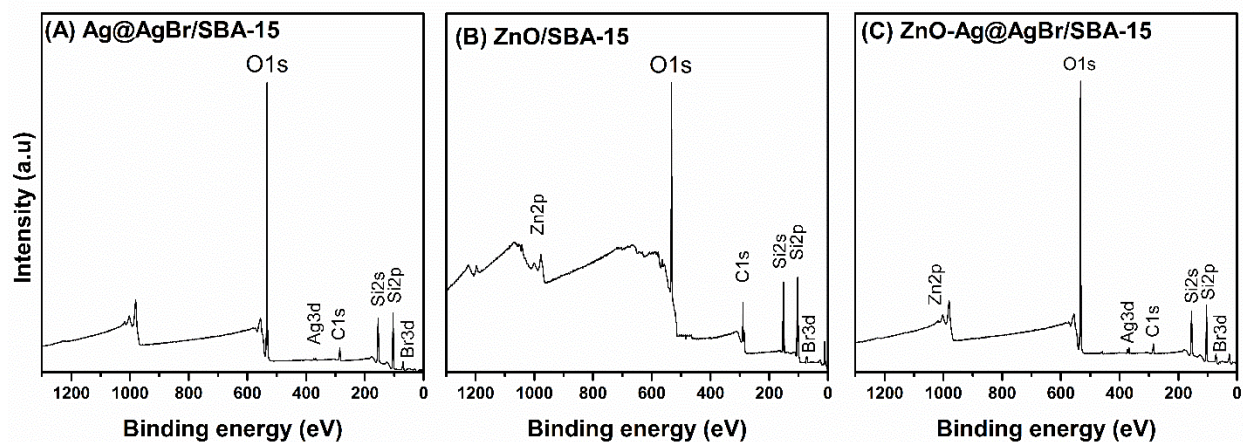

Figure S5. Survey XPS spectra of (A) Ag@AgBr/SBA-15, (B) ZnO/SBA-15 and (C) 20%ZnO-Ag@AgBr/SBA-15 samples

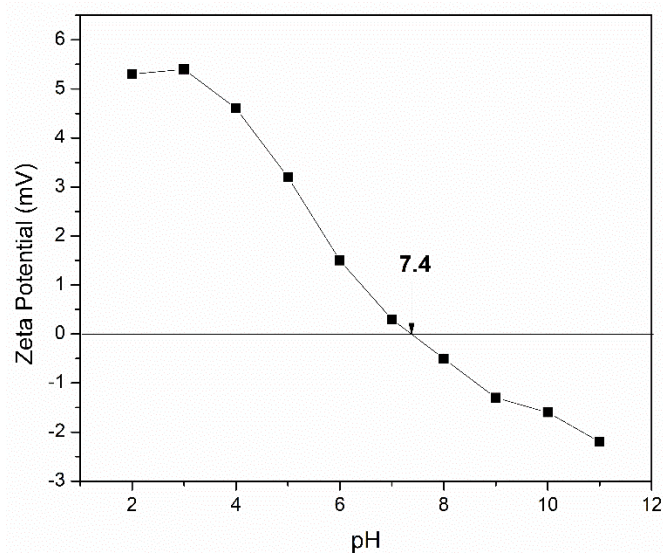

Figure S6. Zeta-potential as a function of pH in 20%ZnO-Ag@AgBr/SBA-15

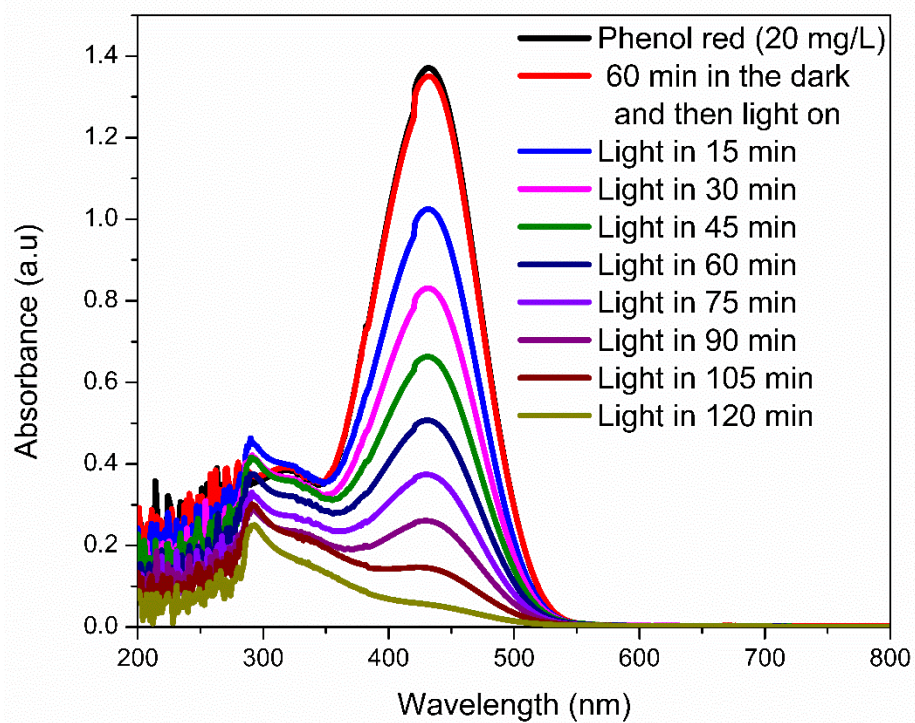

Figure S7. UV-Vis spectra the degradation of phenol red using 20%ZnO-Ag@AgBr/SBA-15 sample

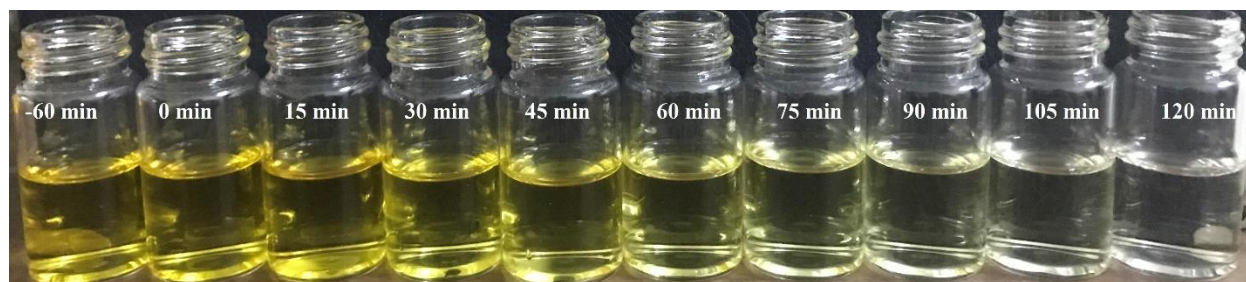

Figure S8. Images of phenol red samples in water treated on photocatalyst 20%ZnO-Ag@AgBr/SBA-15 at different times.



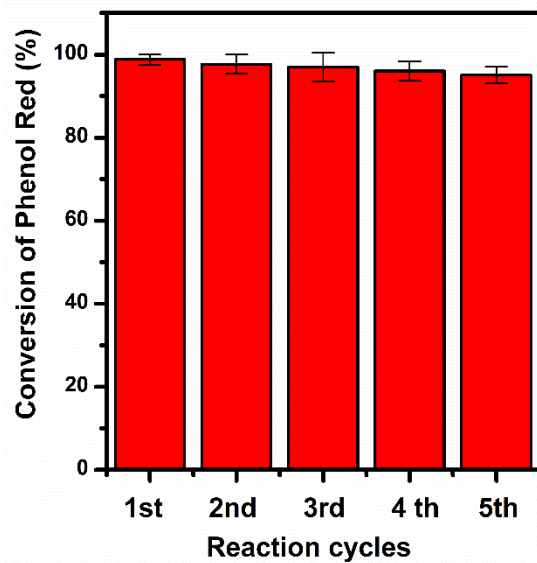

Figure S9. Stability of 20%ZnO-Ag@AgBr/SBA-15 sample at different cycles of reaction

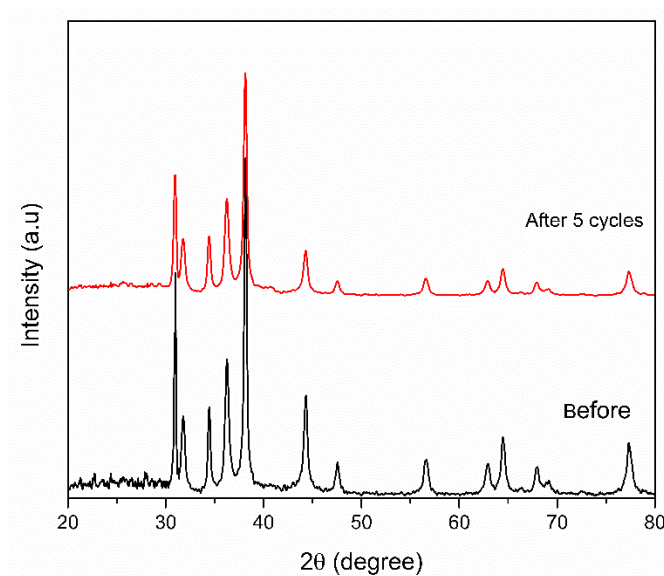

Figure S10. XRD spectra of 20%ZnO-Ag@AgBr/SBA-15 before and after 5 cycles reactions.

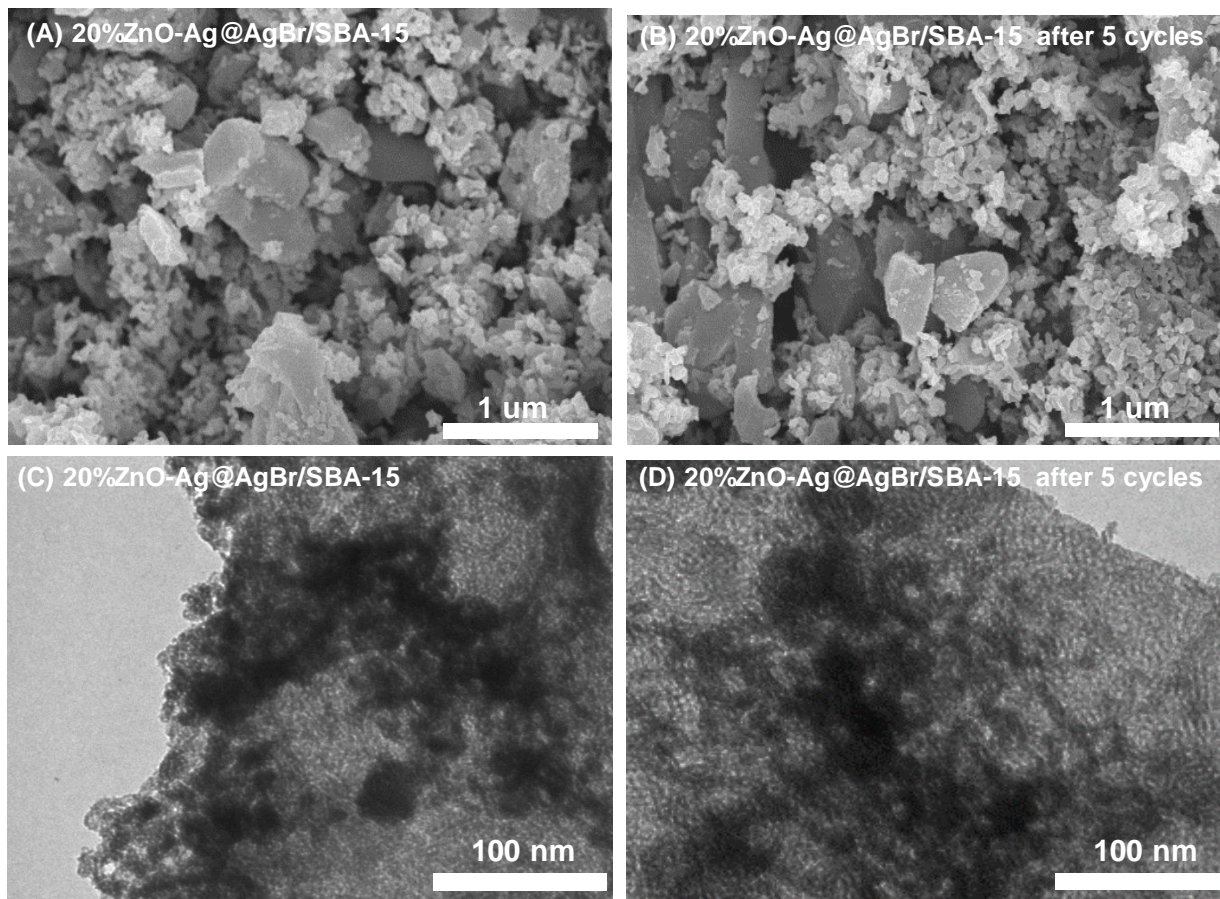

Figure S11. SEM and TEM images of 20%ZnO-Ag@AgBr/SBA-15 before and after 5 cycles reactions.

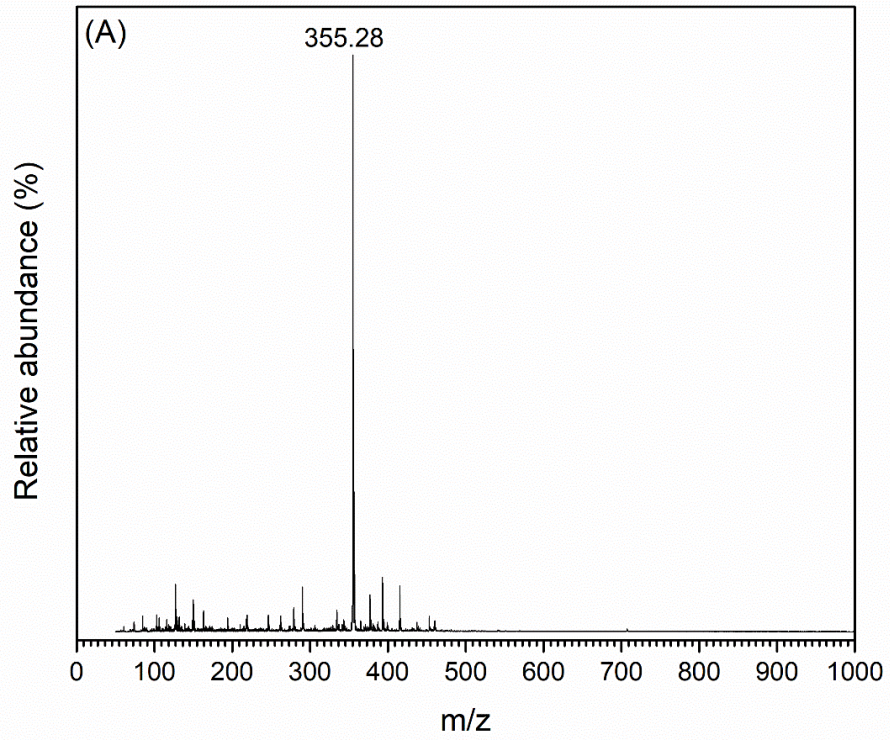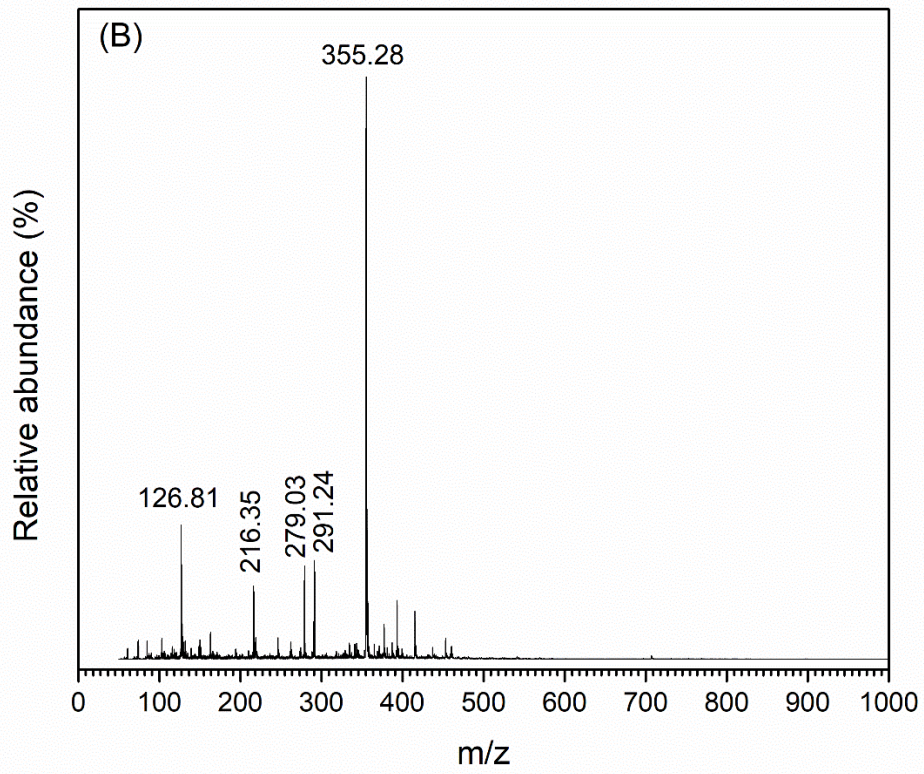

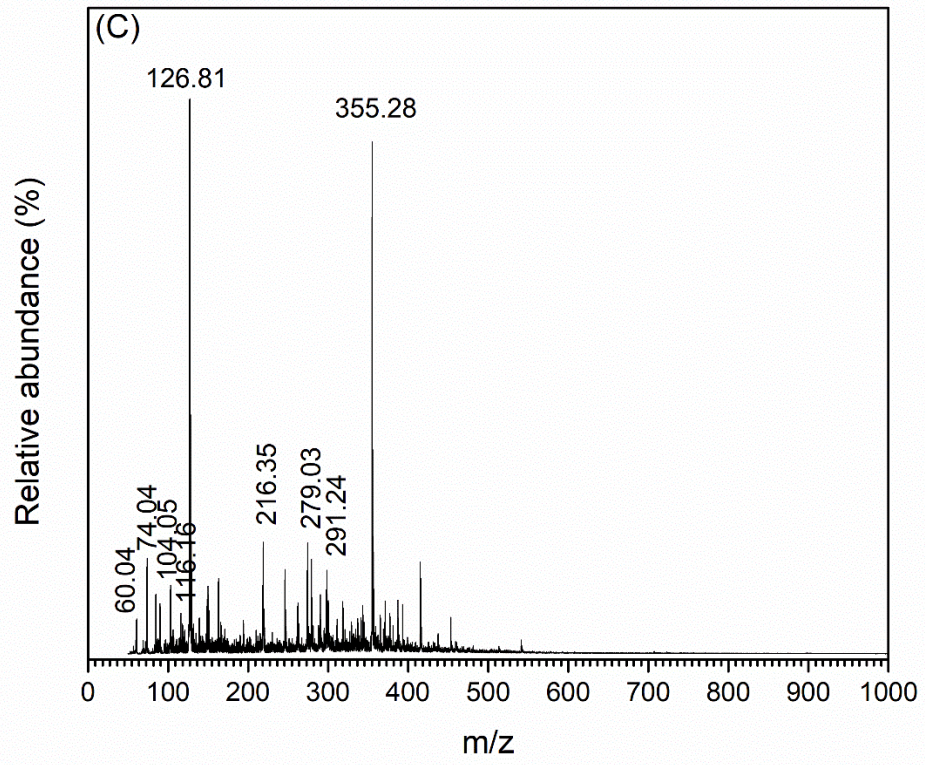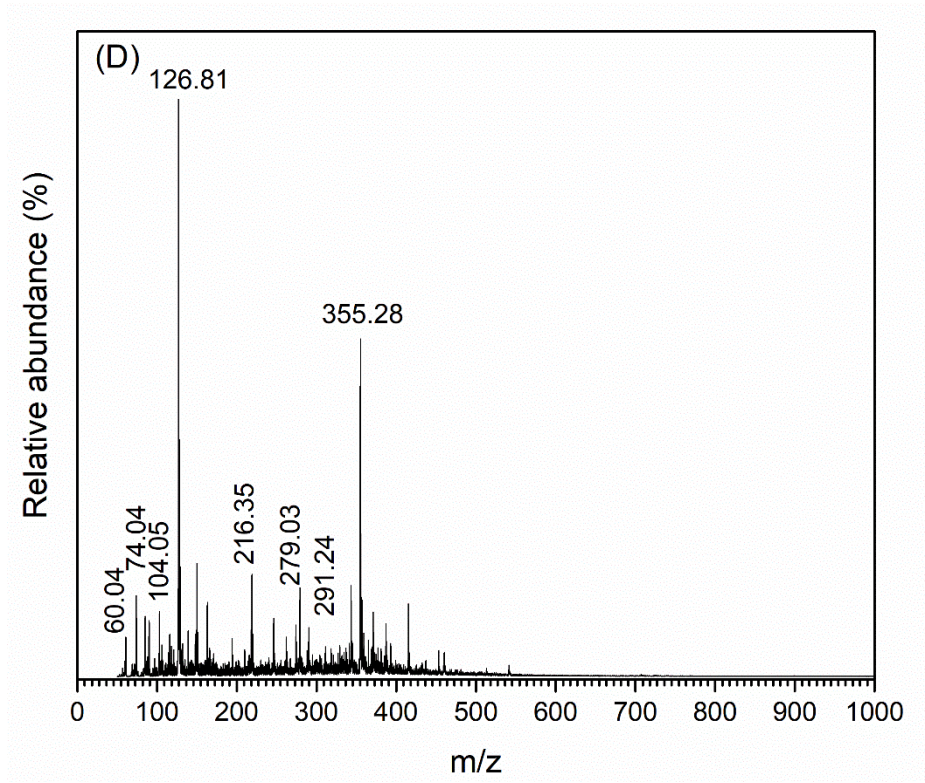

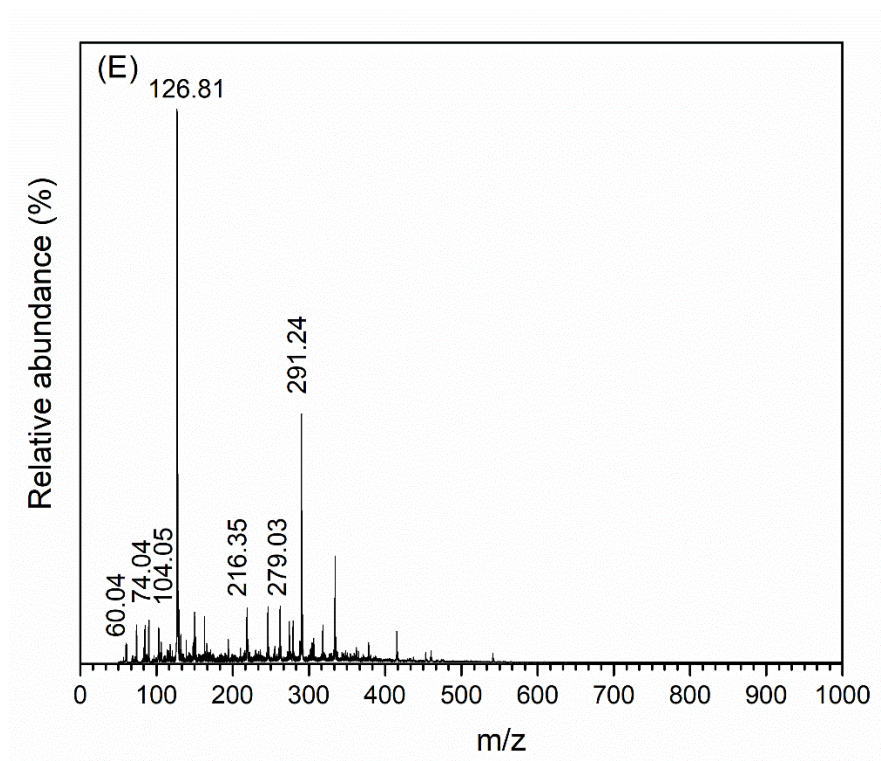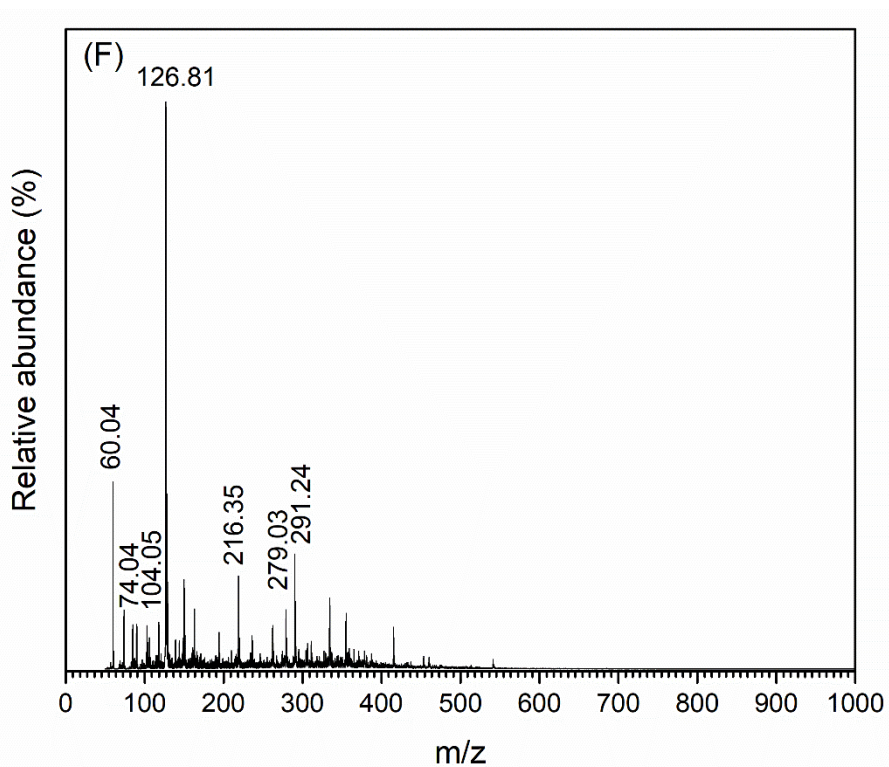

Figure S12. LC-mass spectra of phenol red under visible light (A) 0 min, (B) 15 min, (C) 30 min (D) 45 min, (E) 60 min and (F) 90 min reaction.

## References

- 1 A. M. Asiri, M. S. Al-Amoudi, T. A. Al-Talhi and A. D. Al-Talhi, *Journal of Saudi Chemical Society*, 2011, **15**, 121–128.
- 2 N. Almulhem, C. Awada and N. M. Shaalan, *Crystals*, 2022, **12**, 1–13.
- 3 O. A. Nasief and A. N. Abd, *IOP Conference Series: Earth and Environmental Science*, , DOI:10.1088/1755-1315/779/1/012057.
- 4 H. S. Wahab and A. A. Hussain, *Journal of Nanostructure in Chemistry*, 2016, **6**, 261–274.
- 5 T. K. Tan, P. S. Khiew, W. S. Chiu, S. Radiman, R. Abd-Shukor, N. M. Huang and H. N. Lim, *World Academy of Science, Engineering and Technology*, 2011, **79**, 791–796.
- 6 S. Belattar, N. Debbache, I. Ghoul, T. Sehili and A. Abdessemed, *Water and Environment Journal*, 2018, **32**, 358–365.
